# Supplementary material
Source: MDPI journal article supplement (https://www.mdpi.com/2071-1050/9/12/2080)
Supplement: s1 [file s1]

Article

# Analysis of interval data envelopment efficiency model considering different distribution characteristics

## — Based on environmental performance evaluation of manufacturing industry

Academic Editor: name

Version November 10, 2017 submitted to Sustainability

### 0. supplementary materials

#### 0.1. Theorem

**Theorem 1.** Assume that  $\xi_1, \xi_2, \dots$ , and  $\xi_n$  are independent uncertain variables obeying regular uncertainty distributions  $h_1, h_2, \dots$ , and  $h_n$ , respectively, and  $h_1(x), h_2(x), \dots$ , and  $h_n(x)$ , and  $h_0(x)$  are real-valued functions.

$$M\left\{\sum_{i=1}^n h_i(x)\xi_i \leq h_0(x)\right\} \geq \alpha$$

holds if and only if

$$\sum_{i=1}^n h_i^+(x)\phi_i^{-1}(\alpha) - \sum_{i=1}^n h_i^-(x)\phi_i^{-1}(1-\alpha) \leq h_0(x)$$

where

$$h_i^+(x) = \begin{cases} h_i(x) & h_i(x) > 0 \\ 0 & h_i(x) \leq 0 \end{cases}$$

$$h_i^-(x) = \begin{cases} -h_i(x) & h_i(x) < 0 \\ 0 & h_i(x) \geq 0 \end{cases}$$

**Theorem 2.** The equivalent deterministic form of chance Constraint (12-1) in Model (12) is as follows:

$$\sum_{j=1}^n -\lambda_j(\alpha_{rj}y_{rjU} + (1-\alpha_{rj})y_{rjL}) \leq (-S_r^+) - ((1-\alpha_{rj})y_{rj0U} + \alpha_{rj}y_{rj0L})$$

**Theorem 3.** The certain deterministic form of the Constraint (16-2) in the model is as follows:

$$\sum_{j=1}^n \lambda_j(\bar{e}_{ij} - (\sqrt{3}\bar{\sigma}_{ij})/\pi \ln((\bar{\alpha}_{ij})/(1-\bar{\alpha}_{ij}))) + S_i^- \leq \theta * ((\bar{e}_{x_{ij0}} - (\sqrt{3}\bar{\sigma}_{x_{ij0}})/\pi \ln((\bar{\alpha}_{ij})/(1-\bar{\alpha}_{ij}))))$$

#### 0.2. Proof

Constraint

$$\sum_{j=1}^n \lambda_j \tilde{y}_{rj} \geq \tilde{y}_{rj0} + S_r^+$$

Multiplied by  $(-1)$  on the left and right sides, the inequation is subjected to a linear distribution, which is converted to the following:

$$-\sum_{j=1}^n \lambda_j \tilde{y}_{rj} \leq (-S_r^+) - \tilde{y}_{rj_0}$$

Furthermore, let

$$\tilde{x}_{ij} \sim \ell [x_{ijL}, x_{ijU}], \tilde{y}_{rj} \sim \ell [y_{rjL}, y_{rjU}], \tilde{z}_{rj} = -\tilde{y}_{rj} \sim \ell [-y_{rjU}, -y_{rjL}]$$

So Constraint (12-1) could be converted as follows:

$$M\{\sum_{j=1}^n \lambda_j \tilde{z}_{rj} \leq (-S_r^+) + \tilde{z}_{rj_0}\} \geq 1 - \alpha_{rj}$$

Through Definition 4, the corresponding linear conversion could be obtained as follows:

$$\sum_{j=1}^n \lambda_j (\alpha_{rj} z_{rjL} + (1 - \alpha_{rj}) z_{rjU}) \leq (-S_r^+) + ((1 - \alpha_{rj}) z_{rj_0U} + \alpha_{rj} z_{rj_0L})$$

We subsequently substitute and reorganize Constraint (12-1). The deterministic form of chance Constraint (12-2) of Model (12) is as follows:

$$\sum_{j=1}^n \lambda_j (\bar{\alpha}_{ij} x_{ijL} + (1 - \bar{\alpha}_{ij}) x_{ijU}) + (S_i^-) \leq \theta * ((1 - \bar{\alpha}_{ij}) x_{ij_0L} + \bar{\alpha}_{ij} x_{ij_0U})$$

#### 4. 0.3. Proof

$$\sum_{j=1}^n \lambda_j \tilde{y}_{rj} \geq \tilde{y}_{rj_0} + S_r^+$$

This can be multiplied by  $(-1)$  on the left and right sides and then the inequation is subject to normal distribution, which is converted to the following:

$$-\sum_{j=1}^n \lambda_j \tilde{y}_{rj} \leq (-S_r^+) - \tilde{y}_{rj_0}$$

Let

$$\tilde{x}_{ij} \sim \text{Normal}(\bar{e}_{ij}, \bar{\sigma}_{ij}), \tilde{y}_{rj} \sim \text{Normal}(e_{rj}, \sigma_{rj})$$

Then

$$\tilde{z}_{rj} = -\tilde{y}_{rj} \sim \text{Normal}[-y_{rjU}, -y_{rjL}]$$

So the Constraint (16-1) can be converted as follows:

$$M\{\sum_{j=1}^n \lambda_j \tilde{z}_{rj} \leq (-S_r^+) + \tilde{z}_{rj_0}\} \geq 1 - \alpha_{rj}$$

Through Definition 9, we could get the following normal conversion:

$$\sum_{j=1}^n \lambda_j (e_{z_{rj}} - (\sqrt{3}\sigma_{z_{rj}})/\pi \ln((\alpha_{rj})/(1 - \alpha_{rj}))) \leq (-S_r^+) + (e_{z_{rj_0}} - (\sqrt{3}\sigma_{z_{rj_0}})/\pi \ln((\alpha_{rj})/(1 - \alpha_{rj})))$$

#### 5. We subsequently substitute and reorganize Constraint (16-1).

- 6   © 2017 by the authors. Submitted to *Sustainability* for possible open access publication under the terms and conditions  
7 of the Creative Commons Attribution (CC BY) license (<http://creativecommons.org/licenses/by/4.0/>).
